# Supplementary material
Source: ML conference proceedings conference paper supplement (https://openaccess.thecvf.com/content/CVPR2026/html/Zhang_Focus-to-Perceive_Representation_Learning_CVPR_2026_paper.html)
Supplement: Supplementary file 1 [file Zhang_Focus-to-Perceive_Representation_Learning_CVPR_2026_supplemental.pdf]

# Focus-to-Perceive Representation Learning: A Cognition-Inspired Hierarchical Framework for Endoscopic Video Analysis

## Supplementary Material

In the supplementary material, we first summarize the endoscopic video datasets used in our study including pre-training corpora and downstream benchmarks in Section A. Next, we provide implementation details for reproducibility, covering pre-training settings, evaluation protocols, and competitors, in Section B. In Section C, we present additional experimental results including surgical phase recognition, extended ablations, and further visualizations (segmentation/detection comparisons and mask visualizations). Finally, we analyze the failure case and present future research in Section D.

### A. Dataset Details

The datasets used in the experiment include 7 pre-training datasets and 4 downstream task datasets. Although EndoFM-LV [26] and EndoMamba [20] extend the pre-training dataset, the extended datasets are not fully disclosed. Therefore, we still use publicly available datasets including Colonoscopic [13], SUN-SEG [7], LDPolypVideo [12], Hyper-Kvasir [2], Kvasir-Capsule [19], CholecTriplet [14], Renji-Hospital [25], PolypDiag [21], CVC-12k [1], KUMC [9], and Cholec80 [23] as evaluation benchmarks for all experiments.

#### A.1. Pre-training Datasets

We leverage 7 medical video datasets spanning diagnostic endoscopy, capsule endoscopy, and laparoscopic surgery as unlabeled sources for self-supervised pre-training. In total, these datasets provide 32,896 videos with 5,024,101 frames. Unless otherwise stated, we sample 30 FPS short clips with an average duration of 5 seconds from each video. Representative frames from all datasets are shown in Fig. 1, illustrating the diversity in imaging modality, anatomical site, and visual appearance.

**Colonoscopic** [13] is a small-scale medical video dataset collected from routine screening colonoscopies, focusing on gastrointestinal lesions (mainly colorectal polyps) ob-

served under both white-light and narrow-band imaging. It contains 76 short colonoscopy videos centered on individual lesions and captures realistic in-procedure appearance variations such as camera motion, specular highlights, and illumination changes.

**SUN-SEG** [7] is a large-scale colonoscopy video benchmark for polyp-centric analysis, constructed from the SUN database collected at tertiary hospitals. It consists of 1,106 short video clips with 158,690 frames in total, covering diverse polyp sizes, morphologies, and anatomical locations under realistic screening conditions such as rapid camera motion, specular highlights, fluids, and low-contrast mucosa.

**LDPolypVideo** [12] is a diverse colonoscopy video dataset designed to capture real-world variability in colorectal polyps across different patients and examination settings. It contains 160 colonoscopy videos with 40,266 frames, where polyps exhibit wide variations in size, shape, texture, and viewing angle, together with challenging artifacts such as motion blur and occlusions.

**Hyper-Kvasir** [2] is a large-scale gastrointestinal endoscopy dataset collected from routine gastro- and colonoscopy examinations, covering both upper and lower GI tract with a broad spectrum of anatomical landmarks and pathological findings. We use only its video subset, which comprises 374 endoscopic recordings (about 10 hours,  $\sim 0.9M$  frames) of real clinical procedures.

**Kvasir-Capsule** [19] is a large-scale video capsule endoscopy dataset consisting of 117 complete small-bowel examinations acquired with wireless capsule cameras, totaling approximately 4.7M frames. The recordings capture long-range traversal of the gastrointestinal mucosa with diverse findings and image quality variations typical of capsule endoscopy.

**CholecTriplet** [14] is a laparoscopic surgery video dataset built on CholecT50, containing 50 full-length cholecystectomy procedures recorded from the operative camera (about

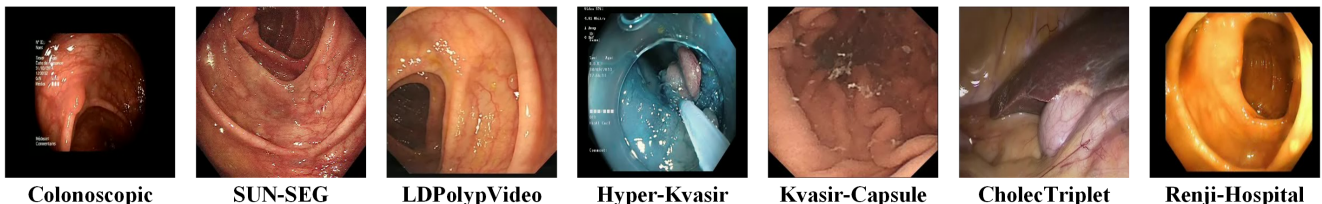

Figure 1. Example frames of the 7 pre-training datasets used in this work.

073  $10^5$  frames at 1 FPS). It provides long, workflow-rich se-  
 074 quences with frequent instrument–tissue interactions and  
 075 view changes that are complementary to diagnostic en-  
 076 doscopy.

077 **Renji-Hospital** [25] is a large-scale clinical endoscopy  
 078 video dataset collected from routine upper and lower  
 079 gastrointestinal examinations at the Baoshan Branch of  
 080 Renji Hospital in Shanghai, China. It comprises 16,494  
 081 colonoscopy clips (2,491,952 frames) and 7,653 gas-  
 082 troscopy clips (1,170,753 frames), covering common mu-  
 083 cosal abnormalities such as polyps and erosions under real-  
 084 world screening and diagnostic conditions.

## 085 A.2. Downstream Datasets

086 We evaluate our representations on 4 labeled benchmarks  
 087 covering disease diagnosis, polyp segmentation, polyp de-  
 088 tection, and surgical phase recognition. Representative  
 089 frames from these downstream datasets are shown in Fig. 2.  
 090 **PolypDiag** [21] is a large-scale endoscopy video dataset  
 091 constructed from Hyper-Kvasir and LDPolypVideo, target-  
 092 ing lesion-level disease diagnosis. It contains 253 short en-  
 093 doscopic clips with 485,561 frames in total, where each clip  
 094 is assigned a binary video-level label indicating the pres-  
 095 ence or absence of neoplastic lesions (polyps or early can-  
 096 cers). We use these video-level lesion labels to fine-tune  
 097 and evaluate our model on the disease classification task.

098 **CVC-12k** [1] is a colonoscopy image dataset built from 18  
 099 video sequences, comprising 11,954 frames of which most  
 100 contain at least one colorectal polyp. Each frame is an-  
 101 notated with a polyp region, originally provided as approx-  
 102 imate masks around the visible lesions. Following Endo-  
 103 FM, we reorganize the annotated frames into 29 short video  
 104 clips (612 labeled frames) and convert the polyp regions  
 105 into pixel-wise masks. This yields a supervised benchmark  
 106 for evaluating polyp segmentation performance.

107 **KUMC** [9] is a colonoscopy polyp detection and classifi-  
 108 cation dataset collected at the University of Kansas Medi-  
 109 cal Center. It consists of 80 video sequences curated from  
 110 routine colonoscopy examinations, where frames are an-  
 111 notated with bounding boxes and categorical labels for indi-  
 112 vidual polyps (adenomatous vs. hyperplastic). We use the  
 113 same data partitioning method as in Endo-FM, which com-  
 114 prises 53 sequences containing approximately 19,832 la-  
 115 beled frames. We leverage the bounding-box and category  
 116 annotations to evaluate the performance of polyp detection.

117 **Cholec80** [23] is a laparoscopic cholecystectomy dataset  
 118 comprising 80 full-length surgical videos (about 40 min-  
 119 utes each) recorded at 25 FPS from 13 surgeons. Each  
 120 frame is annotated with one of seven surgical phases, and  
 121 tool-presence labels are provided at 1 FPS. We follow the  
 122 standard 40/40 train–test split and use only the phase an-  
 123 notations to benchmark cross-domain transfer on surgical  
 124 workflow recognition.

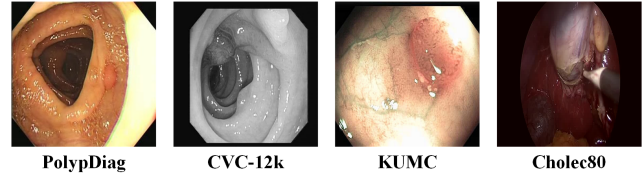

Figure 2. Example frames of the 4 downstream datasets used in this work.

## B. Implementation Details

### B.1. Pre-training Settings

Our *FPRL* is built based on EndoMamba-S [20], where the patch size and embedding dimension are set to 16 and 384, respectively. For every input video, we generate 3 views with spatial size  $224 \times 224$  and 2 frames per view from a temporal window. The model is trained using the AdamW optimizer [11] with a base learning rate of  $1.5e-4$ , a cosine learning rate schedule for 400 epochs, and a batch size of 64, with the first 40 epochs dedicated to linear warmup. For feature alignment, the pretrained VideoMamba-S [10] serves as the teacher model. In accordance with the EndoMamba configuration, the weight for the feature alignment loss is set to  $\lambda_2 = 0.8$ . The other hyperparameters of the loss functions are established as follows:  $\lambda_1 = 1.0$ ,  $\lambda_3 = 1.0$ , and  $\lambda_{pf} = 20$ , based on preliminary experiments. The general hyperparameter settings for our *FPRL* framework during the training process are summarized in Table 1. All experiments are conducted using PyTorch [17] on a Linux machine equipped with four NVIDIA A800 GPUs.

### B.2. Evaluation Settings

For downstream fine-tuning, we utilize the following setup on a single NVIDIA A800 GPU. 1) *PolypDiag*: We sample 8 frames at a resolution of  $224 \times 224$  from each video as input, utilizing a pre-trained model to initialize the backbone and appending randomly initialized linear layers, and train for 20 epochs. The SGD optimizer is employed, with the learning rate set to  $1e-3$ , momentum to 0.9, and batch size to 4. 2) *CVC-12k*: A TransUNet [3] equipped with *FPRL* as the backbone is implemented. The AdamW optimizer is used to optimize the overall parameters by setting the learning rate as  $1e-4$ , weight decay as  $5e-2$  and the batch size as 1. We resize the spatial resolution to  $224 \times 224$  and fine-tune for 150 epochs. 3) *KUMC*: We implement an STFT [27] with our pre-trained model as backbone for generating a feature pyramid. We resize the spatial size to  $640 \times 640$  and train for 24k iterations. The SGD optimizer is used to optimize the overall parameters by setting the learning rate as  $2.5e-3$ , weight decay as  $1e-4$  and momentum as 0.9. 4) *Cholec80*: We utilize SV-RCNet [8] for endoscopic surgical phase recognition, in which *FPRL* serves as a temporal

Table 1. Pre-training settings.

| Hyperparameter                | Value                           |
|-------------------------------|---------------------------------|
| Sampling strategies           |                                 |
| temporal window length        | 50                              |
| number of view frames         | 2                               |
| crop size                     | 224 × 224                       |
| mask ratio                    | 0.9                             |
| Optimizing settings           |                                 |
| optimizer                     | AdamW                           |
| learning rate schedule        | Cosine                          |
| weight decay                  | 0.05                            |
| optimizer momentum            | $\beta_1, \beta_2 = 0.9, 0.999$ |
| patch size                    | 16                              |
| base learning rate            | $1.5 \times 10^{-4}$            |
| warm-up epochs                | 40                              |
| pretraining epochs            | 400                             |
| batch size of each GPU        | 64                              |
| feature dimension             | 384                             |
| Loss functions                |                                 |
| weight of reconstruction loss | $\lambda_1 = 1$                 |
| weight of feature align loss  | $\lambda_2 = 0.8$               |
| weight of contrastive loss    | $\lambda_3 = 1$                 |
| weight of squeezing loss      | $\lambda_{pf} = 20$             |

166 module for extracted features. The input frames are resized  
 167 to 224×224 and the model is trained for 25 epochs. Both  
 168 *FPRL* and randomly initialized modules are updated dur-  
 169 ing downstream fine-tuning. For the evaluation metrics, fol-  
 170 lowing the previous works, we use F1 score for PolypDiag,  
 171 Dice for CVC-12k, F1 score for KUMC, and accuracy for  
 172 Cholec80.

### 173 B.3. Competitors

174 We compare the proposed *FPRL* with several recent SOTA  
 175 approaches for endoscopy video analysis. These ap-  
 176 proaches include:

- 177 • FAME [4] utilizes foreground–background merging to al-  
 178 leviate background bias and enhance motion-aware video  
 179 representations.
- 180 • ProViCo [16] proposes a probabilistic video contrastive  
 181 learning scheme that models clip-wise uncertainty in the  
 182 latent space.
- 183 • VCL [18] focuses on jointly learning static and dynamic  
 184 concepts to improve video representation modeling.
- 185 • ST-Adapter [15] inserts lightweight spatio-temporal  
 186 adapters into frozen image backbones for parameter-  
 187 efficient image-to-video transfer.
- 188 • VideoMAE [22] is a masked autoencoder baseline that  
 189 learns video representations by reconstructing highly

- 190 masked video tubes.
- 191 • Endo-FM [25] develops a transformer-based foundation  
 192 model pre-trained on large-scale endoscopic videos.
- 193 • DropMAE [28] augments masked autoencoding with  
 194 spatial-attention dropout to better capture temporal cor-  
 195 respondences for downstream tracking and segmentation  
 196 tasks.
- 197 • VideoMAE V2 [24] scales VideoMAE with dual mask-  
 198 ing and large-scale pre-training to build a general video  
 199 foundation model.
- 200 • M<sup>2</sup>CRL [6] integrates multi-view masked modeling with  
 201 contrastive learning, tailored for endoscopic video pre-  
 202 training.
- 203 • VideoMamba [10] introduces a state-space-based video  
 204 backbone that models long-range spatio-temporal dynam-  
 205 ics with linear complexity.
- 206 • EndoFM-LV [26] extends Endo-FM to a minute-level  
 207 pre-training framework on long endoscopy video se-  
 208 quences.
- 209 • EndoMamba [20] is an efficient endoscopic foundation  
 210 model built on bidirectional and causal Mamba blocks un-  
 211 der a hierarchical pre-training scheme.

## C. Additional Experimental Results 212

### C.1. Surgical Phase Recognition 213

214 To assess the generalizability of *FPRL* to long-horizon rea-  
 215 soning, we further evaluate it on surgical phase recognition  
 216 using the Cholec80 dataset. We follow the standardized pro-  
 217 tocol adopted in prior works, training on the official training  
 218 videos and reporting frame-wise phase classification accu-  
 219 racy on the test split. From Table 2, we can observe that  
 220 the proposed *FPRL* achieves  $85.3 \pm 8.0\%$  accuracy, outper-  
 221 forming recent self-supervised and foundation-model base-  
 222 lines such as M<sup>2</sup>CRL, VideoMamba, EndoFM-LV, and En-  
 223 doMamba, which indicates that the representations learned  
 224 by *FPRL* transfer well to long-horizon workflow modeling.

Table 2. Surgical phase recognition.

| Method                 | Venue       | Year     | Accuracy          |
|------------------------|-------------|----------|-------------------|
| FAME [4]               | CVPR        | 2022     | 81.9 ± 9.2        |
| ProViCo [16]           | CVPR        | 2022     | 82.3 ± 8.5        |
| ST-Adapter [15]        | NeurIPS     | 2022     | 81.0 ± 8.7        |
| EndoSSL [5]            | MICCAI      | 2023     | 83.0 ± 8.0        |
| Endo-FM [25]           | MICCAI      | 2023     | 82.8 ± 9.1        |
| M <sup>2</sup> CRL [6] | NeurIPS     | 2024     | 83.5 ± 8.8        |
| VideoMamba [10]        | ECCV        | 2024     | 84.1 ± 8.9        |
| EndoFM-LV [26]         | JBHI        | 2025     | 85.1 ± 7.9        |
| EndoMamba [20]         | MICCAI      | 2025     | 84.4 ± 8.4        |
| <b>FPRL</b>            | <b>Ours</b> | <b>-</b> | <b>85.3 ± 8.0</b> |

Table 3. Ablation on model architecture variants.

| Model Variant | Performance (%)   |                   |                   |
|---------------|-------------------|-------------------|-------------------|
|               | Cla.              | Seg.              | Det.              |
| EndoMamba-T   | 92.2 ± 0.4        | 83.8 ± 0.3        | 81.7 ± 0.9        |
| EndoMamba-S   | <b>95.2 ± 0.3</b> | 86.1 ± 0.1        | <b>89.8 ± 0.1</b> |
| EndoMamba-M   | 92.3 ± 0.1        | <b>87.4 ± 0.5</b> | 89.5 ± 0.2        |

Table 4. Ablation on Decoder depth and CVMFC blocks.

| Stacked Layers |       | Performance (%)   |                   |                   |
|----------------|-------|-------------------|-------------------|-------------------|
| Decoder        | CVMFC | Cla.              | Seg.              | Det.              |
| 4              | 1     | 95.2 ± 0.3        | <b>86.1 ± 0.1</b> | <b>89.8 ± 0.1</b> |
|                | 2     | 94.4 ± 0.5        | 85.3 ± 0.8        | 85.2 ± 1.0        |
|                | 3     | 92.9 ± 0.4        | 86.1 ± 0.7        | 87.4 ± 0.9        |
| 8              | 1     | 93.8 ± 0.4        | 85.4 ± 0.5        | 84.6 ± 0.4        |
|                | 2     | <b>96.0 ± 0.7</b> | 85.5 ± 0.8        | 87.7 ± 0.8        |
|                | 3     | 89.9 ± 0.6        | 84.9 ± 0.2        | 86.7 ± 0.9        |

225

## C.2. Additional Ablations

226

227

228

229

230

231

232

233

234

235

236

237

238

239

240

241

242

243

244

245

246

247

248

249

250

251

252

253

254

255

**Ablation on Different Architectures.** As shown in Table 3, scaling the backbone from EndoMamba-T to EndoMamba-S consistently improves performance across all three downstream tasks, particularly in detection, which shows an improvement of +8.1%. However, further scaling to EndoMamba-M primarily benefits segmentation while slightly degrading classification and detection performance. This suggests that the small variant provides a more favorable balance between capacity and performance.

**Ablation on Auxiliary Module.** Table 4 analyzes the impact of decoder depth and the number of cross-view masked feature completion (CVMFC) blocks. Notably, a shallow 4-layer decoder equipped with a single CVMFC block achieves optimal overall performance. In contrast, deeper decoders and multiple CVMFC blocks yield only marginal gains or have adverse effects. This observation suggests that excessive temporal decoding may lead to over-smoothing of features, ultimately hindering dense prediction capabilities.

**Ablation on Loss Formulations.** As reported in Table 5, the combination of cosine similarity with an  $\ell_2$  regression term significantly outperforms all other loss formulations across classification, segmentation, and detection tasks. Substituting either cosine similarity with cross-entropy or  $\ell_2$  with  $\ell_1$  results in a marked decline in performance, thereby confirming that regressing continuous teacher features using a cosine +  $\ell_2$  objective is more effective than alignment based on discrete classification.

**Ablation on the Number of Sampled Frames.** Table 6 investigates the effects of the number of sampled frames. Utilizing two sparsely sampled frames yields optimal overall

Table 5. Ablation on loss formulations.

| Loss Formulations |            | Performance (%)   |                   |                   |
|-------------------|------------|-------------------|-------------------|-------------------|
| Similarity        | Regression | Cla.              | Seg.              | Det.              |
| Cosine            | $\ell_1$   | 92.3 ± 0.5        | 85.0 ± 0.8        | 87.3 ± 1.0        |
|                   | $\ell_2$   | <b>95.2 ± 0.3</b> | <b>86.1 ± 0.1</b> | <b>89.8 ± 0.1</b> |
| Cross-Entropy     | $\ell_1$   | 91.1 ± 0.5        | 80.3 ± 0.7        | 85.9 ± 0.9        |
|                   | $\ell_2$   | 92.9 ± 0.7        | 82.6 ± 0.8        | 87.5 ± 0.8        |

Table 6. Ablation on the number of sampled frames.

| Number of Frames | Performance (%)   |                   |                   |
|------------------|-------------------|-------------------|-------------------|
|                  | Cla.              | Seg.              | Det.              |
| 1                | 94.4 ± 1.6        | 86.0 ± 0.9        | 88.6 ± 1.1        |
| 2                | <b>95.2 ± 0.3</b> | <b>86.1 ± 0.1</b> | <b>89.8 ± 0.1</b> |
| 3                | 93.0 ± 0.5        | 85.2 ± 0.4        | 85.4 ± 0.1        |

performance and surpasses single-frame training. However, incorporating three frames consistently detracts from performance across all tasks. This decline is likely due to the introduction of redundant non-semantic motion present in endoscopic videos when additional views are included.

256

257

258

259

260

## C.3. Additional Visualization Results

261

**Qualitative Results for Segmentation.** Fig. 3 shows a visual comparison of segmentation results between our method and other self-supervised pre-training approaches on the CVC-12k dataset. Polyps frequently present with indistinct boundaries and considerable variations in shape, which pose significant challenges for accurate segmentation. Nevertheless, our approach consistently yields superior results when compared to other leading self-supervised methods. In particular, as shown in the first and second rows for larger polyps, while other methods often misclassify or overlook certain lesion regions, our approach effectively distinguishes polyps from normal tissues. Moreover, although all methods exhibit comparable performance in segmenting isolated small polyps, only our method successfully delineates all polyps when multiple small instances are present together within a single frame.

262

263

264

265

266

267

268

269

270

271

272

273

274

275

276

277

**Qualitative Results for Detection.** Fig. 4 presents the detection results obtained from our method and other competing self-supervised pre-training models applied to the KUMC dataset. Our approach exhibits superior performance in both boundary recognition and localization of small polyps. Although all methods can generally identify the actual lesion area in high-contrast scenarios (as shown in the first and second rows), other methods tend to incorporate extraneous normal tissue, whereas our approach achieves a higher level of localization precision. Moreover, even under challenging conditions, such as low contrast, blurred polyp boundaries, or complex backgrounds, our ap-

278

279

280

281

282

283

284

285

286

287

288

289

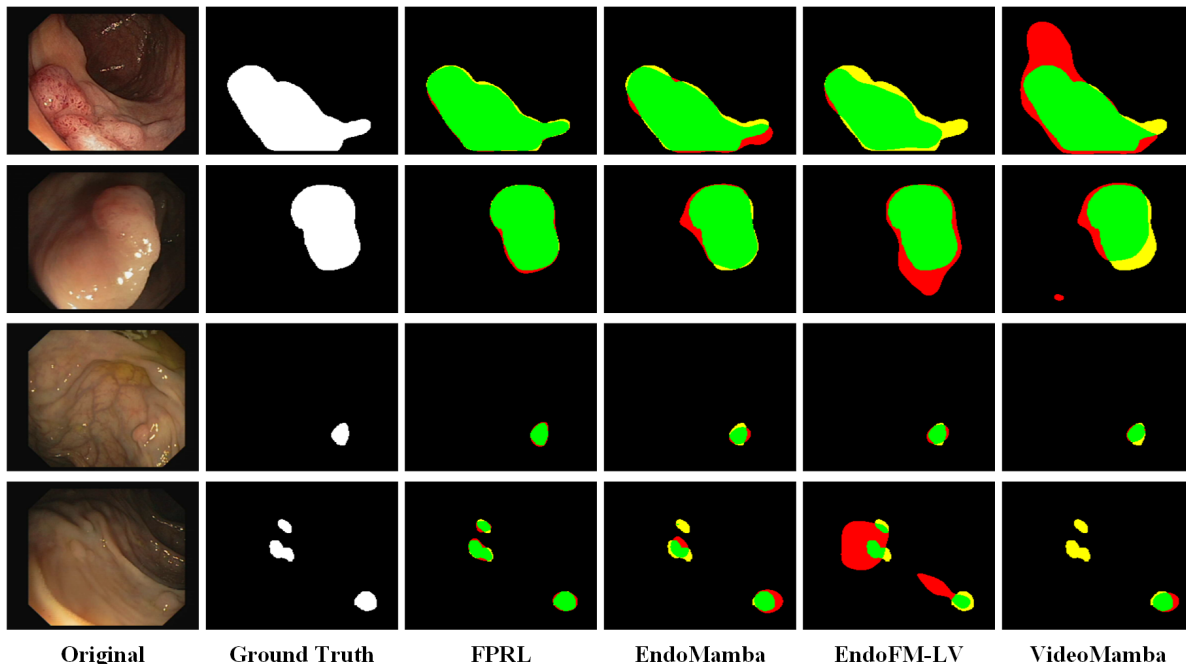

Figure 3. Qualitative results for segmentation task on the CVC-12k dataset, where green, red, and yellow regions represent the true positive, false positive, and false negative, respectively.

290 proach remains robust in accurately identifying polyp loca-  
 291 tions. This capability is attributed to the effective represen-  
 292 tation learning of salient lesion regions facilitated by our  
 293 proposed *Static Semantic Focus* mechanism.

294 **Mask Generation Process.** Figure 5 illustrates our teacher-  
 295 prior adaptive masking strategy. We generate a saliency  
 296 map from the frozen teacher network, capturing lesion-  
 297 aware global priors, while a lightweight network produces  
 298 a complementary map emphasizing view-specific cues such  
 299 as local contrast. These are fused into a unified importance  
 300 map, where we employ a Top-K sampling strategy to select  
 301 the most informative regions, retaining only the correspond-  
 302 ing patches while masking out the remainder. This process  
 303 suppresses irrelevant regions like background and specular  
 304 reflections, directing model focus to clinically meaningful  
 305 structures. The resulting masks (shown in the last column)  
 306 concentrate on polyp interiors and boundaries, promoting  
 307 more focused reconstruction and stable pre-training.

## 308 D. Failure Case Analysis

### 309 D.1. Failure Case

310 As reported in Table 6, the single-frame setting consistently  
 311 underperforms the two-frame configuration, which appears  
 312 at odds with our design objective of suppressing dynamic  
 313 redundancy and non-semantic motion by keeping each view  
 314 as short as possible. We argue that this discrepancy mainly  
 315 stems from the imperfect quality of real endoscopic videos.

In practice, many sequences contain frames that are heav-  
 ily affected by motion blur, abrupt camera shake, illumina-  
 tion flicker, specular highlights, or transient occlusions from  
 tools and fluids (see Fig. 6). Under the single-frame regime,  
 such degradations directly contaminate the only available  
 observation in a view, thereby corrupting the supervision  
 signal for reconstruction and making the learned represen-  
 tations highly sensitive to occasional low-quality frames.

## D.2. Future Research

From a broader perspective, the above failure case indicates  
 that the gap between the single-frame and two-frame set-  
 tings is largely driven by data quality issues rather than by  
 the sparse-view design itself. This suggests three main di-  
 rections for further improvement. First, the frame sampling  
 strategy could be made more robust to low-quality observa-  
 tions, so that views are less likely to be dominated by severe  
 blur, illumination fluctuation, or transient occlusions. Sec-  
 ond, the pre-training framework could be refined to leverage  
 sparse multi-frame information in a more systematic man-  
 ner, utilizing additional frames primarily to enhance robust-  
 ness while still guiding the model to focus on semantically  
 meaningful dynamics. Finally, dataset curation and aug-  
 mentation strategies that explicitly account for typical en-  
 doscopic artifacts may further narrow the performance gap  
 observed in Table 6. We leave a systematic exploration of  
 these directions for future research.

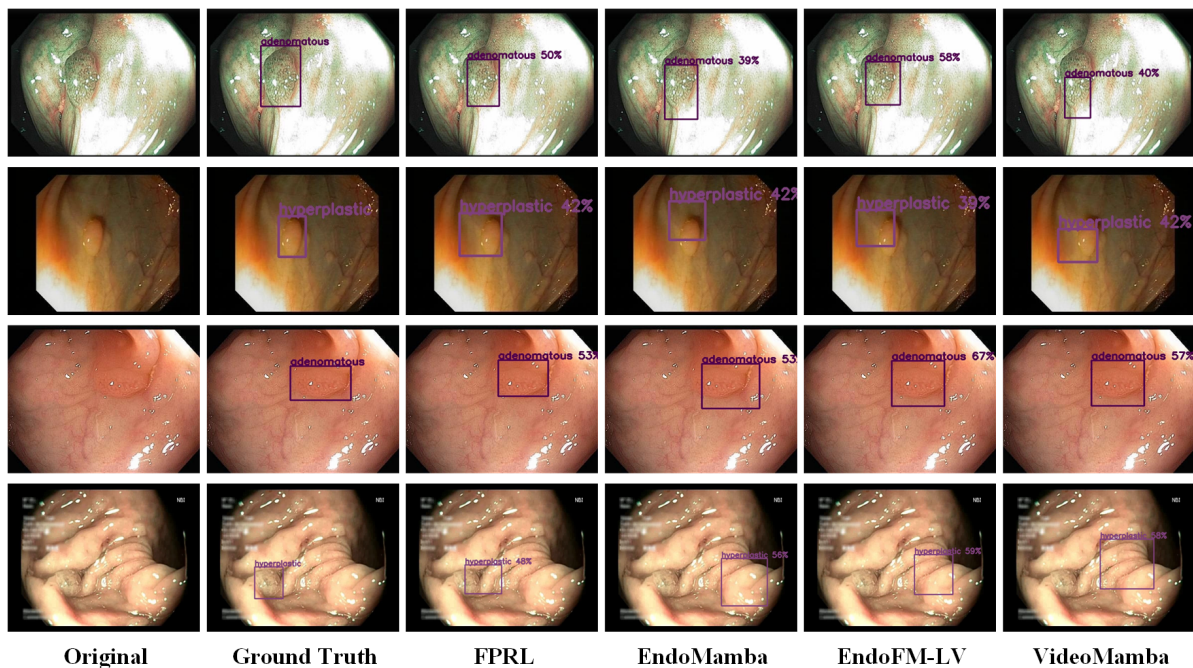

Figure 4. Qualitative results for detection task on the KUMC dataset.

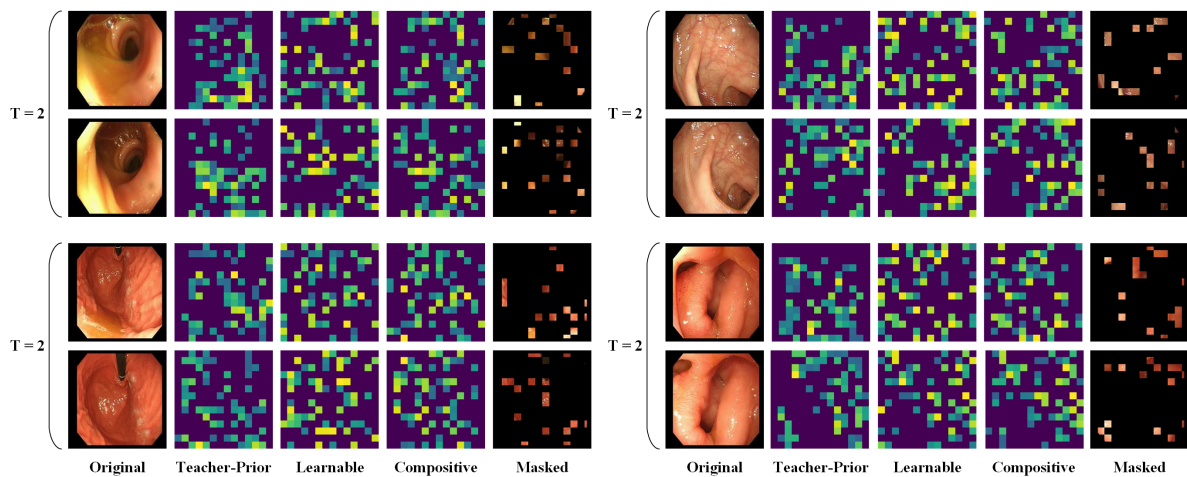

Figure 5. Illustration of our teacher-prior adaptive masking strategy. We visualize the feature heatmaps from both the teacher and the lightweight network (columns 2 & 3). The important regions (column 4) are then selected through a weighted aggregation of these heatmaps, where visible patches are sampled via a Top-K strategy.

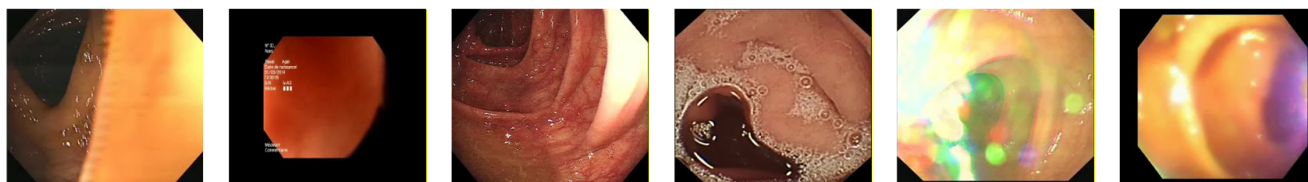

Figure 6. Examples of low-quality sampling frames.

342

## References

343

344

345

346

347

348

349

350

351

352

353

354

355

356

357

358

359

360

361

362

363

364

365

366

367

368

369

370

371

372

373

374

375

376

377

378

379

380

381

382

383

384

385

386

387

388

389

390

391

392

393

394

395

396

397

398

- [1] Jorge Bernal, F Javier Sánchez, Gloria Fernández-Esparrach, Debora Gil, Cristina Rodríguez, and Fernando Vilariño. Wm-dova maps for accurate polyp highlighting in colonoscopy: Validation vs. saliency maps from physicians. *Computerized Medical Imaging and Graphics*, 43:99–111, 2015. 1, 2
- [2] Hanna Borgli, Vajira Thambawita, Pia H Smedsrud, Steven Hicks, Debesh Jha, Sigrun L Eskeland, Kristin Ranheim Randel, Konstantin Pogorelov, Mathias Lux, Duc Tien Dang Nguyen, et al. Hyperkvasir, a comprehensive multi-class image and video dataset for gastrointestinal endoscopy. *Scientific Data*, 7(1):283, 2020. 1
- [3] Jieneng Chen, Jieru Mei, Xianhang Li, Yongyi Lu, Qihang Yu, Qingyue Wei, Xiangde Luo, Yutong Xie, Ehsan Adeli, Yan Wang, Matthew P. Lungren, Shaoting Zhang, Lei Xing, Le Lu, Alan Yuille, and Yuyin Zhou. Transunet: Rethinking the u-net architecture design for medical image segmentation through the lens of transformers. *Medical Image Analysis*, 97:103280, 2024. 2
- [4] Shuangrui Ding, Maomao Li, Tianyu Yang, Rui Qian, Hao-hang Xu, Qingyi Chen, Jue Wang, and Hongkai Xiong. Motion-aware contrastive video representation learning via foreground-background merging. In *Proceedings of the IEEE/CVF Conference on Computer Vision and Pattern Recognition*, pages 9716–9726, 2022. 3
- [5] Roy Hirsch, Mathilde Caron, Regev Cohen, Amir Livne, Ron Shapiro, Tomer Golany, Roman Goldenberg, Daniel Freedman, and Ehud Rivlin. Self-supervised learning for endoscopic video analysis. In *International Conference on Medical Image Computing and Computer-Assisted Intervention*, pages 569–578. Springer, 2023. 3
- [6] Kai Hu, Ye Xiao, Yuan Zhang, and Xieping Gao. Multi-view masked contrastive representation learning for endoscopic video analysis. *Advances in Neural Information Processing Systems*, 37:47987–48014, 2024. 3
- [7] Ge-Peng Ji, Guobao Xiao, Yu-Cheng Chou, Deng-Ping Fan, Kai Zhao, Geng Chen, and Luc Van Gool. Video polyp segmentation: A deep learning perspective. *Machine Intelligence Research*, 19(6):531–549, 2022. 1
- [8] Yueming Jin, Qi Dou, Hao Chen, Lequan Yu, Jing Qin, Chi-Wing Fu, and Pheng-Ann Heng. Sv-rnet: workflow recognition from surgical videos using recurrent convolutional network. *IEEE Transactions on Medical Imaging*, 37(5):1114–1126, 2017. 2
- [9] Kaidong Li, Mohammad I Fathan, Krushi Patel, Tianxiao Zhang, Cuncong Zhong, Ajay Bansal, Amit Rastogi, Jean S Wang, and Guanghui Wang. Colonoscopy polyp detection and classification: Dataset creation and comparative evaluations. *PLOS One*, 16(8):e0255809, 2021. 1, 2
- [10] Kunchang Li, Xinhao Li, Yi Wang, Yinan He, Yali Wang, Limin Wang, and Yu Qiao. Videomamba: State space model for efficient video understanding. In *European Conference on Computer Vision*, pages 237–255. Springer, 2024. 2, 3
- [11] Ilya Loshchilov and Frank Hutter. Decoupled weight decay regularization. In *International Conference on Learning Representations*, 2017. 2
- [12] Yiting Ma, Xuejin Chen, Kai Cheng, Yang Li, and Bin Sun. Ldpolypvideo benchmark: a large-scale colonoscopy video dataset of diverse polyps. In *International Conference on Medical Image Computing and Computer-Assisted Intervention*, pages 387–396. Springer, 2021. 1
- [13] Pablo Mesejo, Daniel Pizarro, Armand Abergel, Olivier Rouquette, Sylvain Beorchia, Laurent Poincloux, and Adrien Bartoli. Computer-aided classification of gastrointestinal lesions in regular colonoscopy. *IEEE Transactions on Medical Imaging*, 35(9):2051–2063, 2016. 1
- [14] Chinedu Innocent Nwoye, Tong Yu, Cristians Gonzalez, Barbara Seeliger, Pietro Mascagni, Didier Mutter, Jacques Marescaux, and Nicolas Padoy. Rendezvous: Attention mechanisms for the recognition of surgical action triplets in endoscopic videos. *Medical Image Analysis*, 78:102433, 2022. 1
- [15] Junting Pan, Ziyi Lin, Xiatian Zhu, Jing Shao, and Hongsheng Li. St-adapter: Parameter-efficient image-to-video transfer learning. *Advances in Neural Information Processing Systems*, 35:26462–26477, 2022. 3
- [16] Jungin Park, Jiyoung Lee, Ig-Jae Kim, and Kwanghoon Sohn. Probabilistic representations for video contrastive learning. In *Proceedings of the IEEE/CVF Conference on Computer Vision and Pattern Recognition*, pages 14711–14721, 2022. 3
- [17] Adam Paszke, Sam Gross, Francisco Massa, Adam Lerer, James Bradbury, Gregory Chanan, Trevor Killeen, Zeming Lin, Natalia Gimelshein, Luca Antiga, et al. Pytorch: An imperative style, high-performance deep learning library. *Advances in Neural Information Processing Systems*, 32, 2019. 2
- [18] Rui Qian, Shuangrui Ding, Xian Liu, and Dahua Lin. Static and dynamic concepts for self-supervised video representation learning. In *European Conference on Computer Vision*, pages 145–164. Springer, 2022. 3
- [19] Pia H Smedsrud, Vajira Thambawita, Steven A Hicks, Henrik Gjestang, Oda Olsen Nedrejord, Espen Næss, Hanna Borgli, Debesh Jha, Tor Jan Derek Berstad, Sigrun L Eskeland, et al. Kvasir-capsule, a video capsule endoscopy dataset. *Scientific Data*, 8(1):142, 2021. 1
- [20] Qingyao Tian, Huai Liao, Xinyan Huang, Bingyu Yang, Dongdong Lei, Sebastien Ourselin, and Hongbin Liu. Endomamba: An efficient foundation model for endoscopic videos via hierarchical pre-training. In *International Conference on Medical Image Computing and Computer-Assisted Intervention*, pages 224–234. Springer, 2025. 1, 2, 3
- [21] Yu Tian, Guansong Pang, Fengbei Liu, Yuyuan Liu, Chong Wang, Yuanhong Chen, Johan Verjans, and Gustavo Carneiro. Contrastive transformer-based multiple instance learning for weakly supervised polyp frame detection. In *International Conference on Medical Image Computing and Computer-Assisted Intervention*, pages 88–98. Springer, 2022. 1, 2
- [22] Zhan Tong, Yibing Song, Jue Wang, and Limin Wang. Videomae: Masked autoencoders are data-efficient learners for self-supervised video pre-training. *Advances in Neural Information Processing Systems*, 35:10078–10093, 2022. 3

- 456 [23] Andru P Twinanda, Sherif Shehata, Didier Mutter, Jacques  
457 Marescaux, Michel De Mathelin, and Nicolas Padoy. En-  
458 donet: a deep architecture for recognition tasks on laparo-  
459 scopic videos. *IEEE Transactions on Medical Imaging*, 36  
460 (1):86–97, 2016. 1, 2
- 461 [24] Limin Wang, Bingkun Huang, Zhiyu Zhao, Zhan Tong, Yi-  
462 nan He, Yi Wang, Yali Wang, and Yu Qiao. Videomae v2:  
463 Scaling video masked autoencoders with dual masking. In  
464 *Proceedings of the IEEE/CVF Conference on Computer Vi-*  
465 *sion and Pattern Recognition*, pages 14549–14560, 2023. 3
- 466 [25] Zhao Wang, Chang Liu, Shaoting Zhang, and Qi Dou. Foun-  
467 dation model for endoscopy video analysis via large-scale  
468 self-supervised pre-train. In *International Conference on*  
469 *Medical Image Computing and Computer-Assisted Intervention*,  
470 pages 101–111. Springer, 2023. 1, 2, 3
- 471 [26] Zhao Wang, Chang Liu, Lingting Zhu, Tongtong Wang,  
472 Shaoting Zhang, and Qi Dou. Improving foundation model  
473 for endoscopy video analysis via representation learning on  
474 long sequences. *IEEE Journal of Biomedical and Health In-*  
475 *formatics*, 2025. 1, 3
- 476 [27] Lingyun Wu, Zhiqiang Hu, Yuanfeng Ji, Ping Luo, and  
477 Shaoting Zhang. Multi-frame collaboration for effective en-  
478 doscopic video polyp detection via spatial-temporal feature  
479 transformation. In *International Conference on Medical Im-*  
480 *age Computing and Computer-Assisted Intervention*, pages  
481 302–312. Springer, 2021. 2
- 482 [28] Qiangqiang Wu, Tianyu Yang, Ziquan Liu, Baoyuan Wu,  
483 Ying Shan, and Antoni B Chan. Dropmae: Masked autoen-  
484 coders with spatial-attention dropout for tracking tasks. In  
485 *Proceedings of the IEEE/CVF Conference on Computer Vi-*  
486 *sion and Pattern Recognition*, pages 14561–14571, 2023. 3
